# Supplementary material for: Using vulnerability assessment to characterize coastal protection benefits provided by estuarine habitats of a dynamic intracoastal waterway
Source: PeerJ journal article supplement (doi:10.7717/peerj.16738), 2024-02-19
Supplement: SupplementalFigureS1.pdf [file SupplementalFigureS1.pdf]

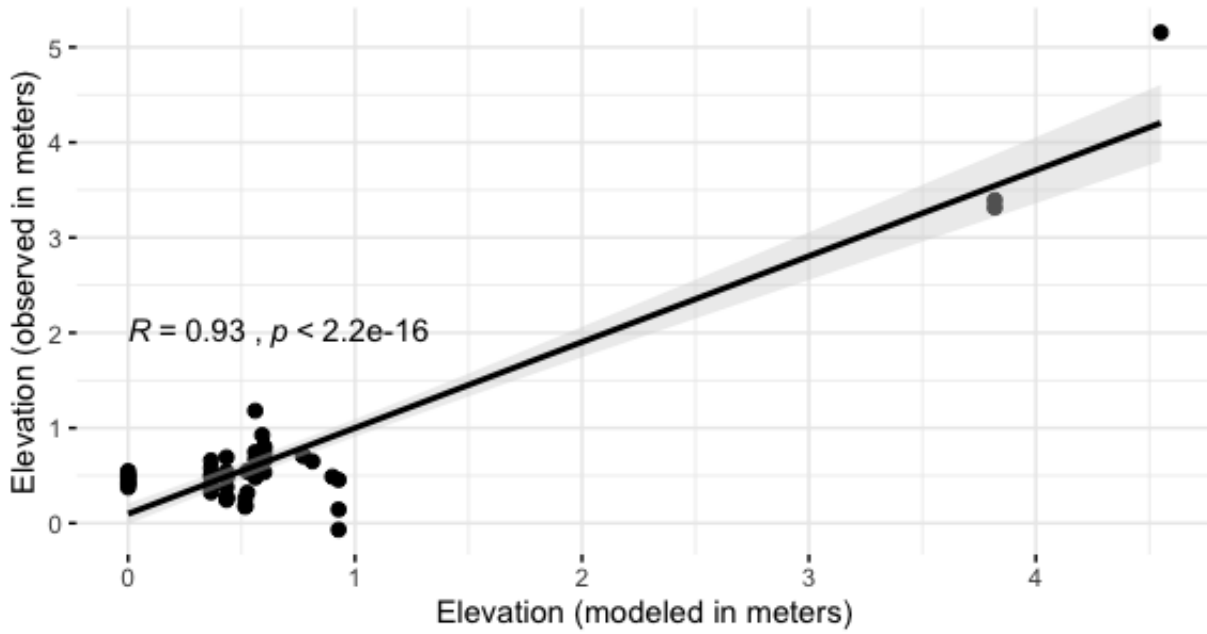

**Figure S1:**  
Scatterplot of linear regression between observed elevation and modeled elevation (LiDAR DEM).
