# Supplementary material for: Using vulnerability assessment to characterize coastal protection benefits provided by estuarine habitats of a dynamic intracoastal waterway
Source: PeerJ journal article supplement (doi:10.7717/peerj.16738), 2024-02-19
Supplement: SupplementalFigureS2.pdf [file SupplementalFigureS2.pdf]

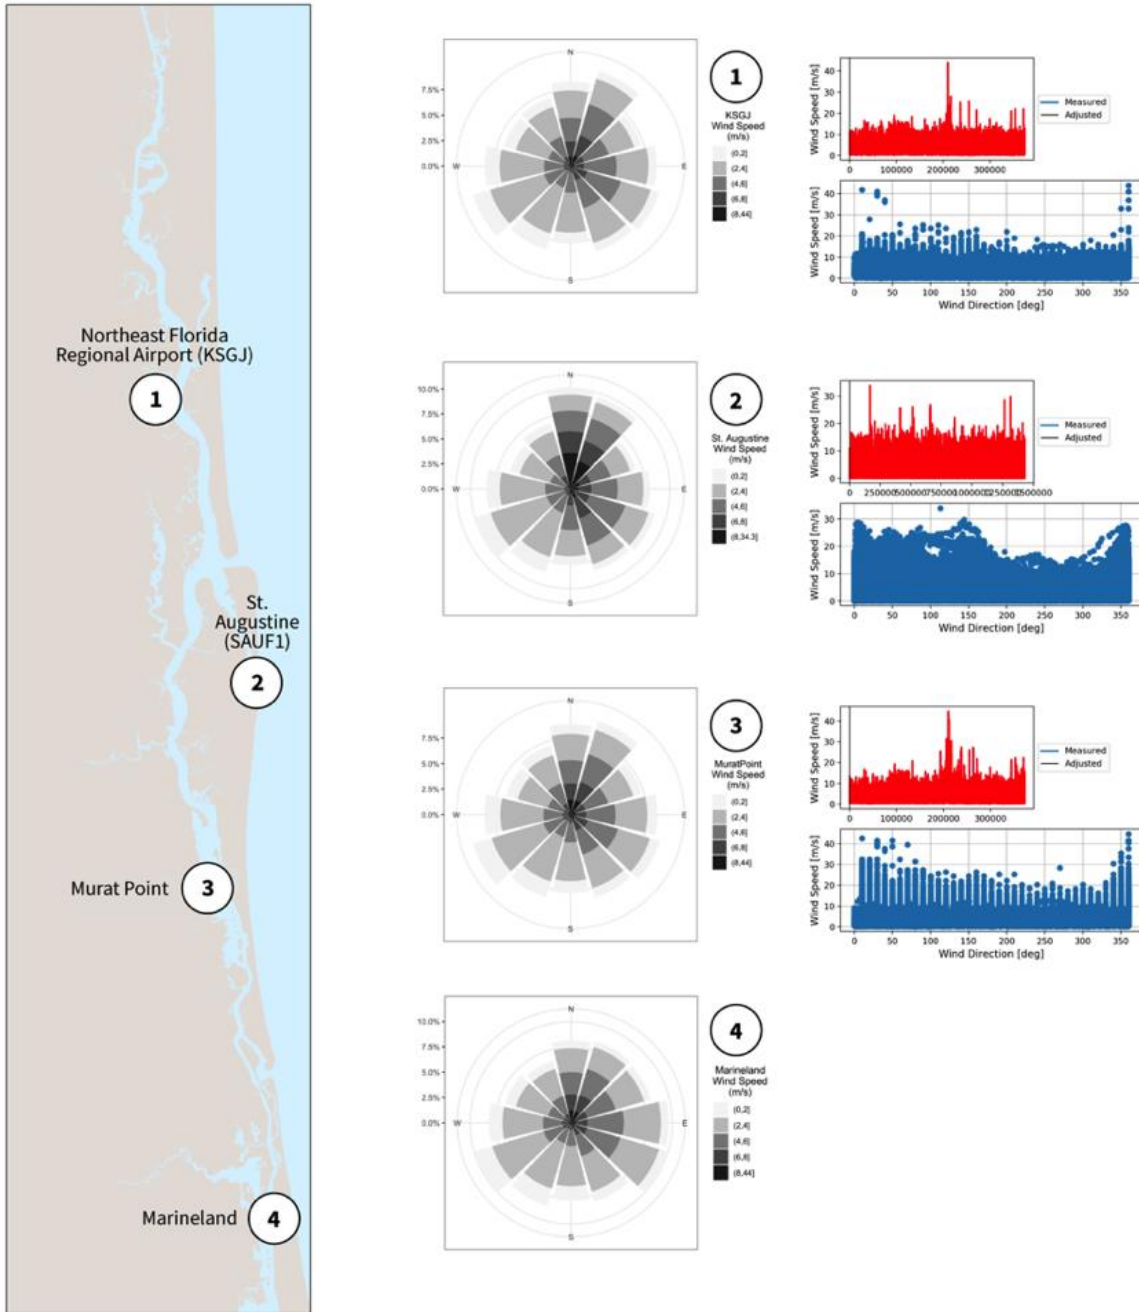

**Figure S2:**  
**Wind rose and statistics of climatic forcing conditions that served as input to the wind exposure variable rank.**
