# Supplementary material for: Using vulnerability assessment to characterize coastal protection benefits provided by estuarine habitats of a dynamic intracoastal waterway
Source: PeerJ journal article supplement (doi:10.7717/peerj.16738), 2024-02-19
Supplement: SupplementalFigureS3.pdf [file SupplementalFigureS3.pdf]

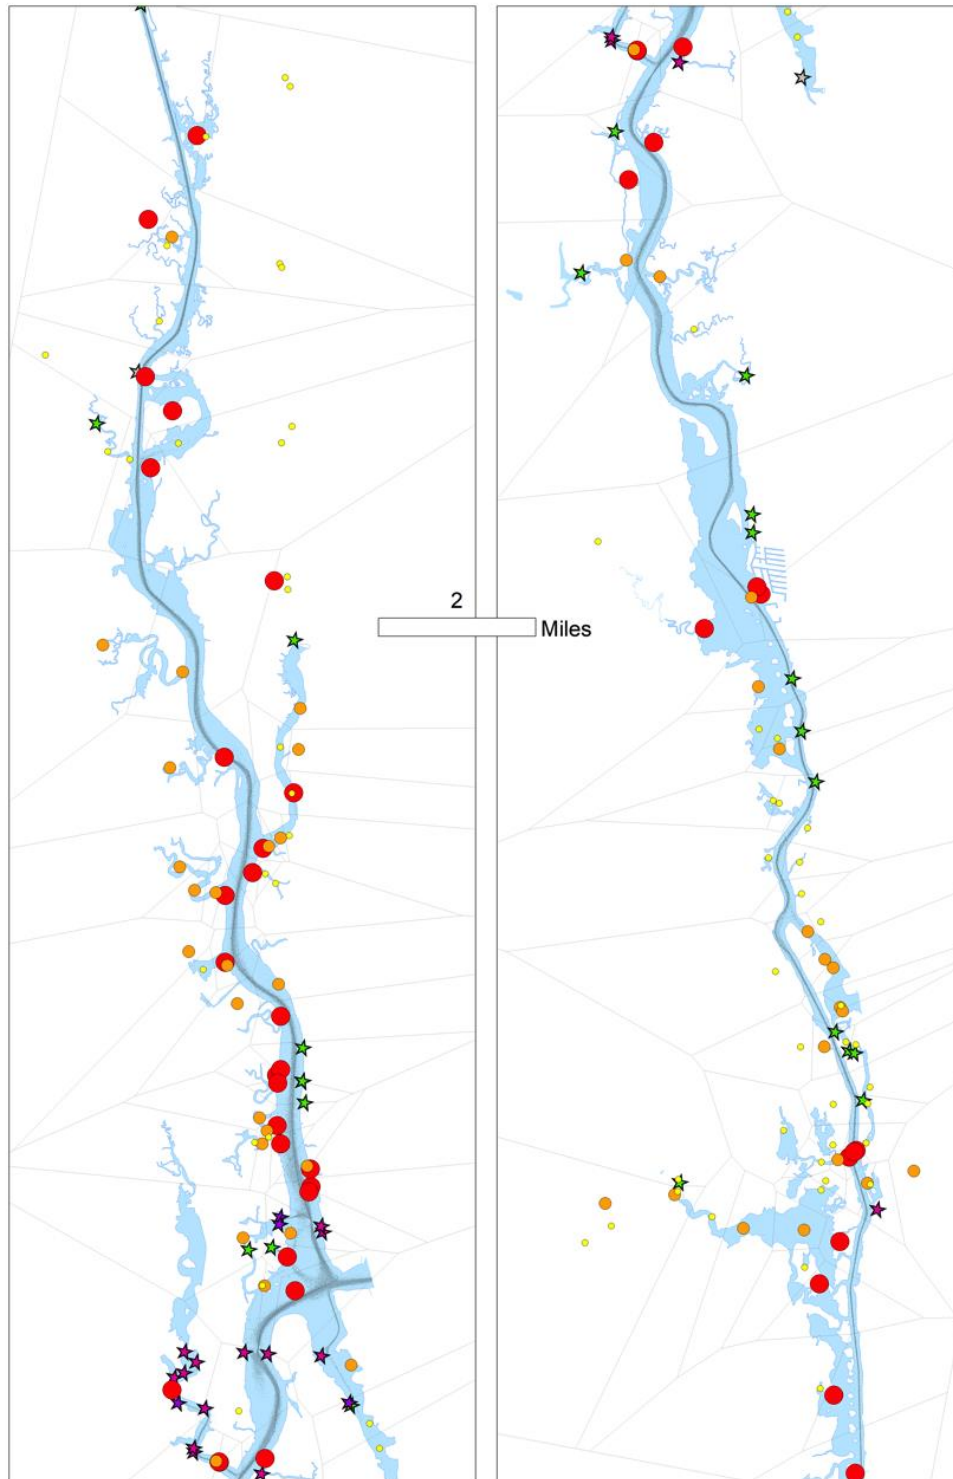

**Figure S3:**  
Boat wake information (dot-symbols) based on interview data collected using a participatory mapping tool; also showing AIS vessel traffic (grey shading), boating features (star-symbols), and Voronoi polygons (grey outlines).
