# Supplementary material for: Using vulnerability assessment to characterize coastal protection benefits provided by estuarine habitats of a dynamic intracoastal waterway
Source: PeerJ journal article supplement (doi:10.7717/peerj.16738), 2024-02-19
Supplement: SupplementalFigureS4.pdf [file SupplementalFigureS4.pdf]

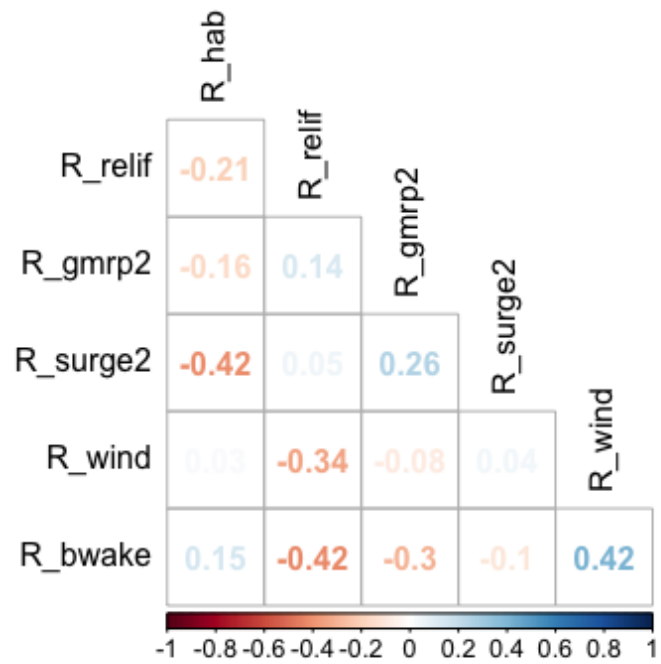

**Figure S4:**  
**Pairwise comparisons and correlation scores of six variables in the exposure index.**
