# Supplementary material for: Using vulnerability assessment to characterize coastal protection benefits provided by estuarine habitats of a dynamic intracoastal waterway
Source: PeerJ journal article supplement (doi:10.7717/peerj.16738), 2024-02-19
Supplement: SupplementalTableS1.pdf [file SupplementalTableS1.pdf]

**Table S1:  
Inputs, sources, and how these data were used by the InVEST coastal  
vulnerability model.**

| Input                    | Source                                                                                                                                                                                           | Spatial resolution          | Use of data in the model                                                                                                                                                                                                       |
|--------------------------|--------------------------------------------------------------------------------------------------------------------------------------------------------------------------------------------------|-----------------------------|--------------------------------------------------------------------------------------------------------------------------------------------------------------------------------------------------------------------------------|
| Land mass polyline       | NOAA Environmental Sensitivity Index (ESI)                                                                                                                                                       | 1:10,000                    | The model uses this shape to delineate shoreline segments at a user-specified interval.                                                                                                                                        |
| Bathymetry and elevation | University of Florida (downsampled pre-Hurricane Matthew LiDAR from the US Geological Survey; 2016)                                                                                              | 50m <sup>2</sup>            | The model determines the average elevation (height in meters) of all DEM cells on land within a 2-km search radius. The resulting distribution is classified using percentile breaks to produce relative ranks of 5 through 1. |
| Geomorphology            | NOAA Environmental Sensitivity Index (ESI); St. Johns County Shoreline Characterization (2018)                                                                                                   | 1:10,000; 30-300m transects | This input data layer will include five geomorphology classifications of each 250-meter shoreline segment ranked from 1 to 4. See Table 2 for ranking scheme.                                                                  |
| Natural habitats         | FL Fish and Wildlife Conservation Commission-Fish and Wildlife Research Institute; FL Department of Environmental Protection; National Wetlands Inventory; UF, Department of Geological Sciences | Varies                      | The model computes a habitat rank from 1 to 5 based on the presence or absence of habitats along each shoreline segment. See Table 2 for ranking scheme and Eq. 3 for the formula.                                             |

| Input                            | Source                                                                                                                                                | Spatial resolution | Use of data in the model                                                                                                                                                                                        |
|----------------------------------|-------------------------------------------------------------------------------------------------------------------------------------------------------|--------------------|-----------------------------------------------------------------------------------------------------------------------------------------------------------------------------------------------------------------|
| Wind exposure (local waves only) | OpenWeatherMap.org (1979-2019); NOAA's National Data Buoy Center (1989-2019)                                                                          | Four weather buoys | The model computes relative wave exposure for each coastline segment by allocating the closest time series data of wind speeds and associated direction, above the 90th percentile value, and fetch distance.   |
| Boat wakes                       | Automatic Identification System (AIS) vessel data from NOAA Marine Cadastre (2017-2018); Stakeholder interviews and participatory mapping (2020-2021) | Varies             | AIS data for the main channel were merged with interview data focusing on the back channels and creek to characterize boat wake energy from 1 to 5 for the entire study area. See Table 2 for ranking scheme    |
| Surge potential                  | The Sea, Lake and Overland Surges from Hurricanes (SLOSH v2) model from the National Weather Service (2018)                                           | 30m <sup>2</sup>   | Surge potential was estimated using SLOSH model outputs for a category 3 storm. The resulting distribution is classified using percentile breaks (33/66) to produce relative ranks of 2 through 4 respectively. |
